# Supplementary material for: Multilayer MoS2 growth by metal and metal oxide sulfurization
Source: Royal Society of Chemistry journal article supplement (doi:10.1039/c5tc04063a), 2016-01-01
Supplement: c5tc04063a1.pdf [file c5tc04063a1.pdf]

# Electronic Supplementary Material

## Multilayer MoS<sub>2</sub> Growth by Metal and Metal-Oxide Sulfurization

M. H. Heyne<sup>a,b,c</sup>, D. Chiappe<sup>a,b</sup>, J. Meersschaut<sup>b</sup>, T. Nuytten<sup>b</sup>, T. Conard<sup>b</sup>, H. Bender<sup>b</sup>, C. Huyghebaert<sup>b</sup>, I. Radu<sup>b</sup>, M. Caymax<sup>b</sup>, J.-F. de Marneffe<sup>b</sup>, E. C. Neyts<sup>c</sup>, S. De Gendt<sup>a,b</sup>

<sup>a</sup> KU Leuven, University of Leuven, Department of Chemistry, Celestijnenlaan 200f - box 2404, 3001 Leuven, Belgium.

<sup>b</sup> imec, Kapeldreef 75, 3001 Leuven, Belgium.

<sup>c</sup> University of Antwerp, Department Chemistry, Universiteitsplein 1, 2610 Antwerp-Wilrijk, Belgium.

S1: SEM images after vacuum annealing at different ramp rates.

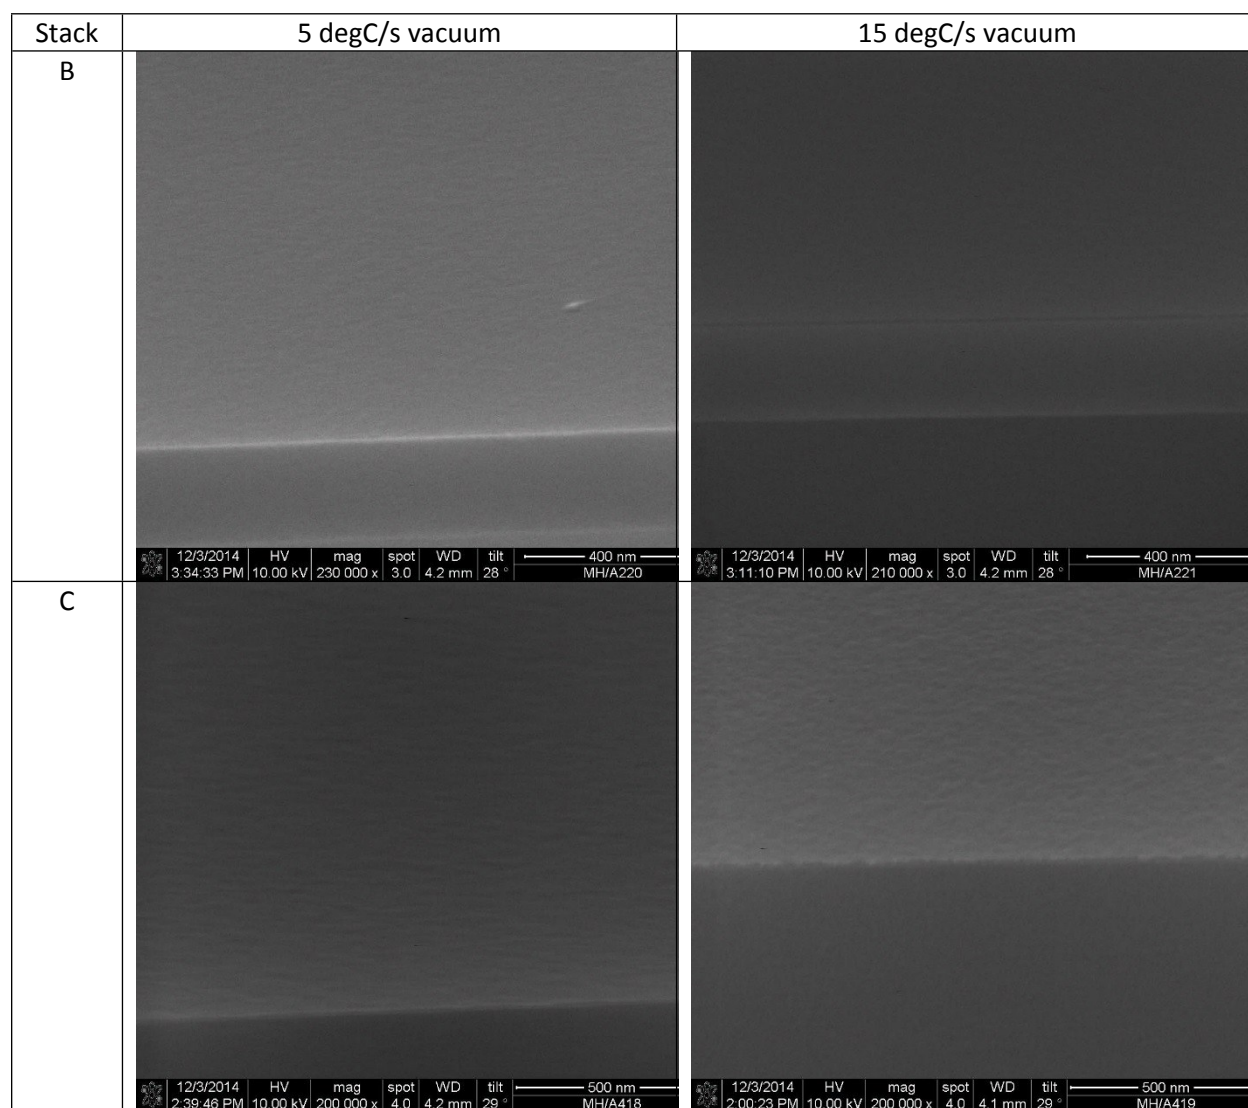

S2: SEM images after H<sub>2</sub>S annealing at different ramp rates.

| Stack | 5 degC/s H <sub>2</sub> S                                                                                                                                                                                                           | 15 degC/s H <sub>2</sub> S                                                                                                                                                                                                                           |
|-------|-------------------------------------------------------------------------------------------------------------------------------------------------------------------------------------------------------------------------------------|------------------------------------------------------------------------------------------------------------------------------------------------------------------------------------------------------------------------------------------------------|
| B     | 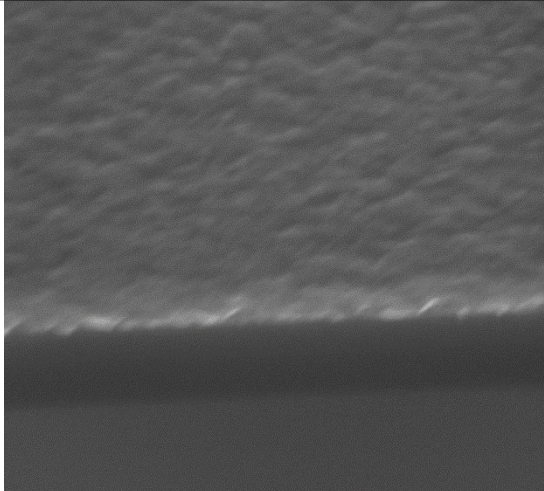 <p data-bbox="310 772 850 808"> <small>1/7/2014 8:48:14 PM HV 5.00 kV mag 200 033 x spot 3.5 WD 4.5 mm tilt 31 ° 500 nm</small> </p>              |  <p data-bbox="873 772 1421 808"> <small>1/11/2014 5:16:21 PM HV 5.00 kV mag 260 000 x spot 3.0 WD 4.3 mm tilt 30 ° det TLD mode SE MH/A030 200 nm</small> </p>    |
| C     |  <p data-bbox="310 1302 850 1339"> <small>10/22/2015 5:52:56 PM HV 8.00 kV spot 3.5 mag 200 000 x WD 4.3 mm tilt 47 ° 500 nm MH/A420</small> </p> |  <p data-bbox="873 1302 1421 1339"> <small>1/11/2014 4:50:58 PM HV 5.00 kV mag 208 906 x spot 3.0 WD 4.4 mm tilt 31 ° det TLD mode SE MH/A325 200 nm</small> </p> |
